# Supplementary material for: ECG Paper Digitization and R Peaks Detection Using FFT
Source: Hindawi journal article supplement (doi:10.1155/2022/1238864), 2022-10-10
Supplement: f1 [file 1238864.f1.docx]

### Import required packages

import csv

import os

import math

import pandas as pd

import numpy as np

import matplotlib.pyplot as plt

# Helps to obtain the FFT

import scipy.fftpack

# Various operations on signals (waveforms)

import scipy.signal as signal

#--------------------matlab calling----------

#--------------clear all figures--------------

plt.close('all')

#-----------------TWILIO SETTING------------

from twilio.rest import Client

# Your Account SID from twilio.com/console

account_sid = "ACb29a162387d2758167e260fae4aae790"

# Your Auth Token from twilio.com/console

auth_token = "9fa59de64aa06dcee70c370f8b3c2a5a"

client = Client(account_sid, auth_token)

###################################################

###Obtain ecg sample from csv file using pandas###

dataset = pd.read_csv("myfile1.csv")

y = [e for e in dataset[dataset.columns[0]]]

# Number of samplepoints

N = len(y)

# sample spacing

Fs = 330

T = 1.0 / Fs

#Compute x-axis

x = np.linspace(0.0, N*T, N)

#Compute FFT

yf = scipy.fftpack.fft(y)

#Compute frequency x-axis

xf = np.linspace(0.0, 1.0//(2.0*T), N//2)

##Declare plots for time-domain and frequency-domain plots##

fig_td = plt.figure()

fig_td.canvas.set_window_title('Time domain signals')

fig_fd = plt.figure()

fig_fd.canvas.set_window_title('Frequency domain signals')

ax1 = fig_td.add_subplot(221)

ax1.set_title('ECG Signal with Noise')

ax2 = fig_td.add_subplot(222)

ax2.set_title(' ECG Signal with Filtering')

ax3 = fig_fd.add_subplot(221)

ax3.set_title('ECG Signal with Noise')

ax4 = fig_fd.add_subplot(222)

ax4.set_title('ECG Signal with Filtering')

#Plot non-filtered inputs

ax1.plot(x,y, color='y', linewidth=0.7)

ax3.plot(xf, 2.0/N * np.abs(yf[:N//2]), color='y', linewidth=0.7, label='raw')

ax3.set_ylim([0 , 0.2])

###Compute filtering co-efficients to eliminate 50hz brum noise###

#band_filt = np.array([45, 55])

#b, a = signal.butter(2, band_filt/(Fs/2), 'bandstop', analog=False)

b, a = signal.butter(4, 50/(Fs/2), 'low')

###ax3.plot(w, 20 * np.log10(abs(h)))

#Compute filtered signal

tempf = signal.filtfilt(b,a, y)

#b, a = signal.butter(1, band_filt/(Fs/2), 'bandstop')

tempf = signal.filtfilt(b,a, y)

yff = scipy.fftpack.fft(tempf)

### Compute Kaiser window co-effs to eliminate baseline drift noise ###

nyq_rate = Fs/ 2.0

# The desired width of the transition from pass to stop.

width = 5.0/nyq_rate

# The desired attenuation in the stop band, in dB.

ripple_db = 60.0

# Compute the order and Kaiser parameter for the FIR filter.

O, beta = signal.kaiserord(ripple_db, width)

# The cutoff frequency of the filter.

cutoff_hz = 4.0

###Use firwin with a Kaiser window to create a lowpass FIR filter.###

taps = signal.firwin(O, cutoff_hz/nyq_rate, window=('kaiser', beta), pass_zero=False)

# Use lfilter to filter x with the FIR filter.

y_filt = signal.lfilter(taps, 1.0, tempf)

yff = scipy.fftpack.fft(y_filt)

#Plot filtered outputs

ax4.plot(xf, 2.0/N * np.abs(yff[:N//2]), color='c', linewidth=0.7)

ax4.set_ylim([0 , 0.2])

ax2.plot(x,y_filt, color='c', linewidth=0.7);

###Compute beats###

dataset['filt']=y_filt

#Calculate moving average with 0.75s in both directions, then append do dataset

hrw = 1 #One-sided window size, as proportion of the sampling frequency

ECG = pd.read_csv("myfile1.csv")

#fs =(len(ECG)//10)+1

fs = 200 #The example dataset was recorded at 300Hz

#mov_avg = pd.rolling_mean(dataset.filt, window=(int(hrw*fs))) #Calculate moving average

mov_avg = dataset.filt.rolling(int(hrw * fs)).mean()

#Impute where moving average function returns NaN, which is the beginning of the signal where x hrw

avg_hr = (np.mean(dataset.filt))

mov_avg = [avg_hr if math.isnan(x) else x for x in mov_avg]

mov_avg = [(0.5+x) for x in mov_avg]

mov_avg = [x*1.2 for x in mov_avg] #For now we raise the average by 20% to prevent the secondary heart contraction from interfering, in part 2 we will do this dynamically

dataset['filt_rollingmean'] = mov_avg #Append the moving average to the dataframe

#Mark regions of interest

window = []

peaklist = []

listpos = 0 #We use a counter to move over the different data columns

for datapoint in dataset.filt:

rollingmean = dataset.filt_rollingmean[listpos] #Get local mean

#print (datapoint , rollingmean)

if (datapoint < rollingmean) and (len(window) < 1): #If no detectable R-complex activity -> do nothing

listpos += 1

elif (datapoint > rollingmean) : #If signal comes above local mean, mark ROI

window.append(datapoint)

listpos += 1

#If signal drops below local mean -> determine highest point

else:

maximum = max(window)

#print(maximum)

if(maximum >2.1):

beatposition = listpos - len(window) + (window.index(max(window)))

#print(beatposition)#Notate the position of the point on the X-axis

peaklist.append(beatposition) #Add detected peak to list

window = [] #Clear marked ROI

listpos += 1

ybeat = [dataset.filt[x] for x in peaklist] #Get the y-value of all peaks for plotting purposes

fig_hr= plt.figure()

fig_hr.canvas.set_window_title('Peak detector')

ax5 = fig_hr.add_subplot(111)

ax5.set_title("Detected peaks in signal")

#ax6.set_xlim(0,2500)

ax5.plot(dataset.filt, alpha=0.5, color='blue',label='ECG') #Plot semi-transparent HR

ax5.plot(mov_avg, color ='green') #Plot moving average

ax5.scatter(peaklist, ybeat, color='red',marker ="*",label='QRS') #Plot detected peaks

#Compute heart rate

RR_list = []

cnt = 0

while (cnt < (len(peaklist)-1)):

RR_interval = (peaklist[cnt+1] - peaklist[cnt]) #Calculate distance between beats in # of samples

ms_dist = ((RR_interval / fs) * 1000.0) #Convert sample distances to ms distances

RR_list.append(ms_dist) #Append to list

cnt += 1

bpm = 60000 / np.mean(RR_list) #60000 ms (1 minute) / average R-R interval of signal

print("\n\n\nAverage Heart Beat is: %.01f\n" %(bpm)) #Round off to 1 decimal and print

print("No of peaks in sample are {0}".format(len(peaklist)))

plt.legend( loc='upper left')

plt.show()

if (bpm>130):

client.messages.create(

to= ("your number"),

from_="+18455521153",

body=" the patient in danger case:\n\n\nAverage Heart Beat is: %.01f\n" %(bpm))

'''

#==============================add new columns to dataset================

if(bpm>)

df = pd.read_csv("myfile1.csv")

df1 = pd.read_csv("myfile4.csv")

total_cols=len(df1.axes[1])+1

df1[total_cols] = df[df.columns[0]]

df1.to_csv("myfile4.csv", index=False)'''
